# Supplementary material for: Increased Emergency Department Hallway Length of Stay is Associated with Development of Delirium
Source: PubMed Central journal article supplement (PMC8202999; doi:10.5811/westjem.2021.1.49320), 2021-04-09
Supplement: wjem-22-726-s001.pdf [file wjem-22-726-s001.pdf]

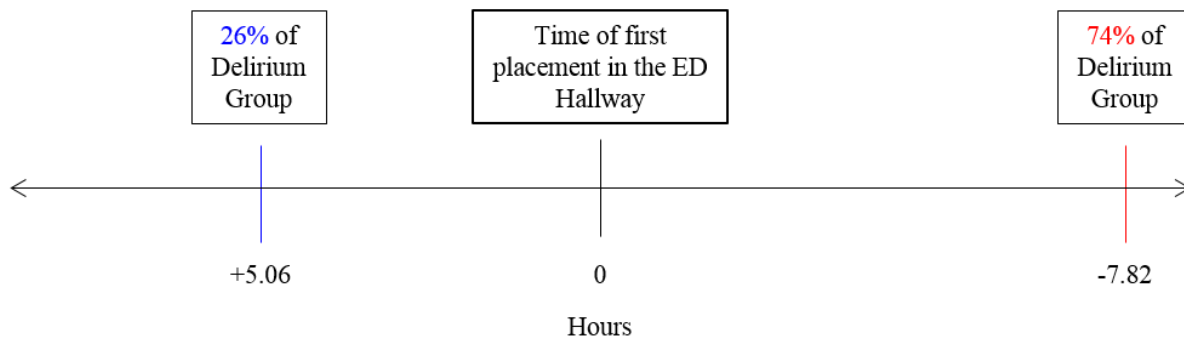

**Supplement Figure.** The relationship between the time of delirium development and the time of placement in the Emergency Department hallway.  
ED, emergency department.
